# Supplementary material
Source: MDPI journal article supplement (https://www.mdpi.com/2073-4344/8/9/351)
Supplement: s1 [file s1]

# Supplementary Materials: Zeolite Supported Ionic Liquid Catalysts for the Hydrochlorination of Acetylene

Bolin Wang, Huixia Lai, Yuxue Yue, Gangfeng Sheng, Yaqin Deng, Haihua He, Lingling Guo, Jia Zhao \* and XiaonianLi \*

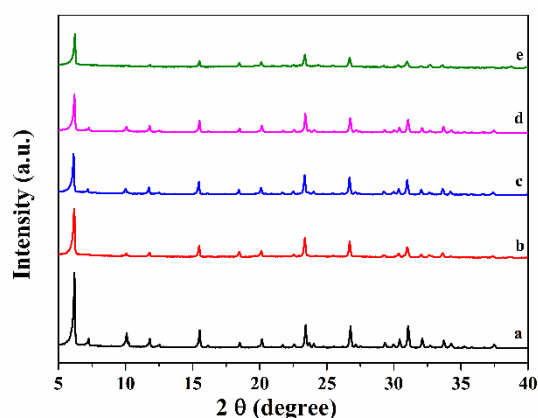

**Figure S1.** X-ray diffraction patterns (XRD) patterns of CaX as a function of the amount of Ca loading: a) CaX, b) CaX-1.46 wt % Ca, c) CaX-3.11 wt % Ca, d) CaX-5.19 wt % Ca, and e) CaX-8.04 wt % Ca.

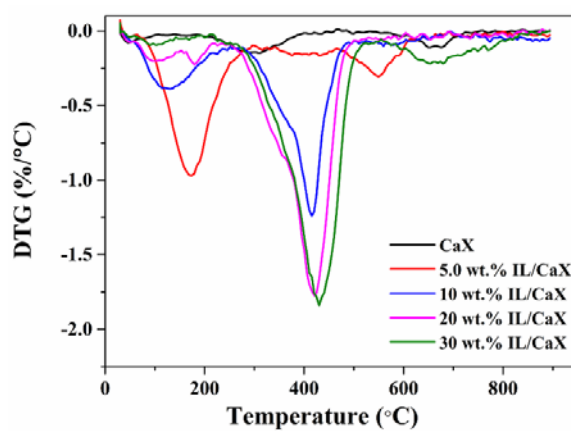

**Figure S2.** The decomposition temperature of [Emim][BF<sub>4</sub>] with different amounts of supporting IL.

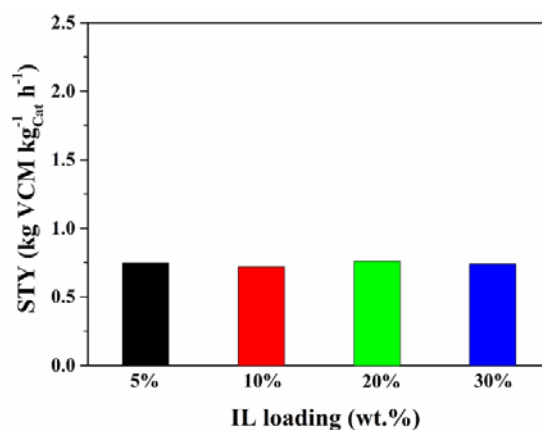

**Figure S3.** Space-time yields of vinyl chloride (VCM) with different supporting ILs catalysts.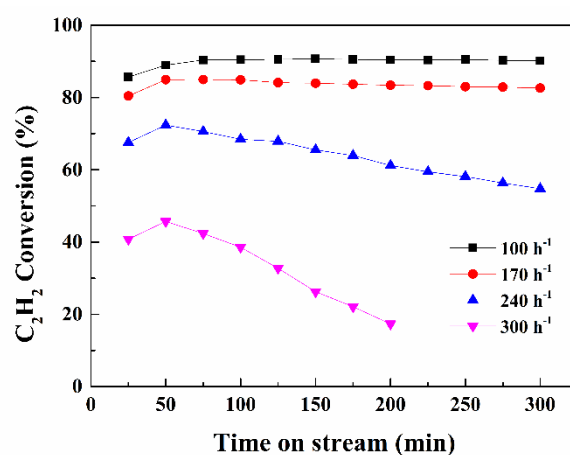**Figure S4.** Catalytic performance as functions of different GHSV (C<sub>2</sub>H<sub>2</sub>) for IL/CaX. Reaction conditions: 320 °C; V(HCl)/V(C<sub>2</sub>H<sub>2</sub>) = 1.2.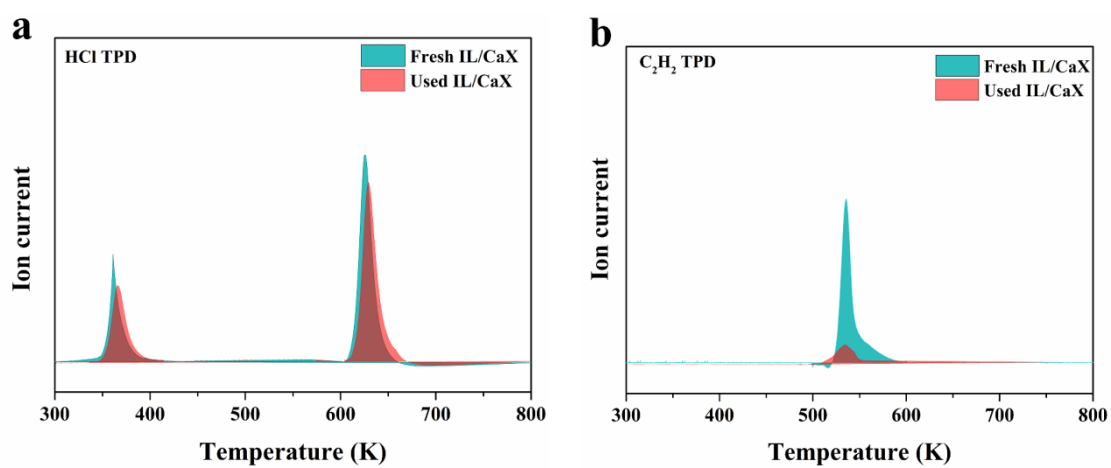**Figure S5.** TPD-MS profiles of HCl and C<sub>2</sub>H<sub>2</sub> on the fresh and used IL/CaX catalysts.
